# Supplementary material
Source: publisher figshare collection journal article supplement (https://karger.figshare.com/ndownloader/files/17448833)
Supplement: Supplementary file 1 [file 17448833]

**Appendix 1** Comparison between endoscopic versus fetoscopic interventions. (mm=millimeter, CO2=carbon dioxide, MMC=myelomeningocele)

|  | **Endoscopic interventions** | **Fetoscopic interventions** |
| --- | --- | --- |
| **Lens diameter** | Bigger lens (5-10 mm)-good visibility | Smaller lens (1.3-2 mm)-limited visibility |
| **Puncture techniques** | Direct puncture (under visualization) | Ultrasound-guided  Seldinger technique |
| **Medium** | CO2 (endoscopy)  Crystalloid (hysteroscopy) | Protein-rich medium  CO2 (for MMC repair) |
| **Ports** | Multiple ports, fixed point | Single port, strategic locations  Multiple ports (for MMC repair) |
| **Target organ** | Mature  Inadvertent damage causes less impact | Developing  Inadvertent damage is magnified. |
